# Supplementary material for: Fabrication of a polyvinylidene fluoride cactus-like nanofiber through one-step electrospinning
Source: PubMed Central journal article supplement — RSC Adv. 2018 Dec 19;8(74):42353–60. doi: 10.1039/c8ra09257e (PMC9092256; doi:10.1039/c8ra09257e), 2018-12-19
Supplement: RA-008-C8RA09257E-s001.pdf [file RA-008-C8RA09257E-s001.pdf]

[Supporting Information]

**Fabrication of polyvinylidene fluoride cactus-like nanofiber through one-step electrospinning**

**Bilal Zaarour<sup>1,2</sup>, Lei Zhu<sup>1</sup>, Chen Huang<sup>1</sup>, Xiangyu Jin<sup>1\*</sup>**

<sup>1</sup>Engineering Research Center of Technical Textiles, Ministry of Education, College of Textiles, Donghua University, No. 2999 North Renmin Road, Songjiang, Shanghai 201620, China.

<sup>2</sup>Textile Industries Mechanical Engineering and Techniques Department, Faculty of Mechanical and Electrical Engineering, Damascus University, Damascus, Syria.

\*Correspondence to: X. Jin (E- mail: jinxy@dhu.edu.cn)

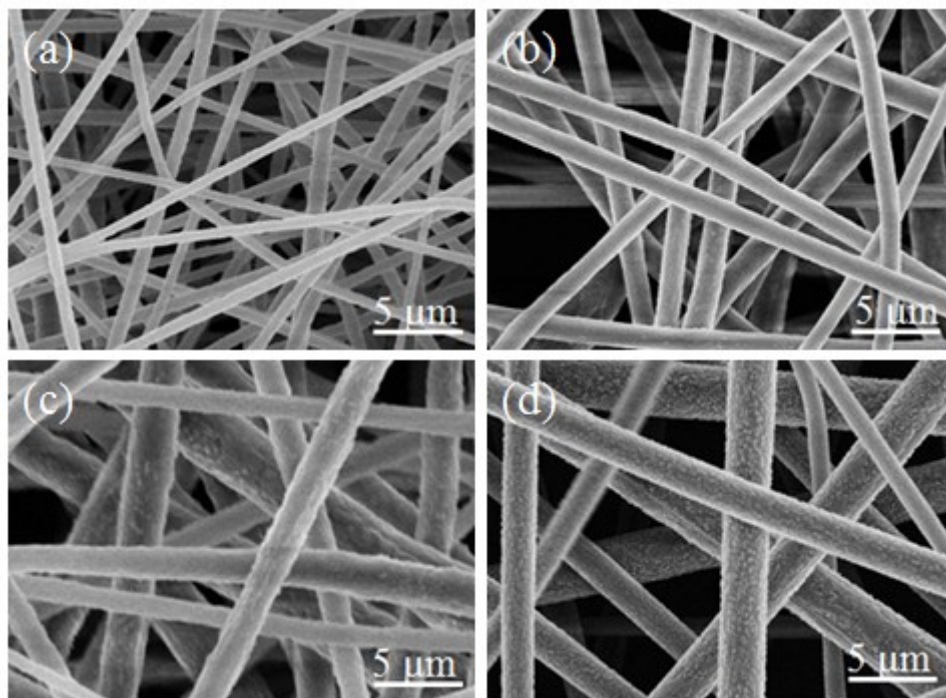

**Fig. S1** SEM images of PVDF fibers electrospun at different levels of RH. (a) 2%, (b) 22%, (c) 42%, and (d) 62%.

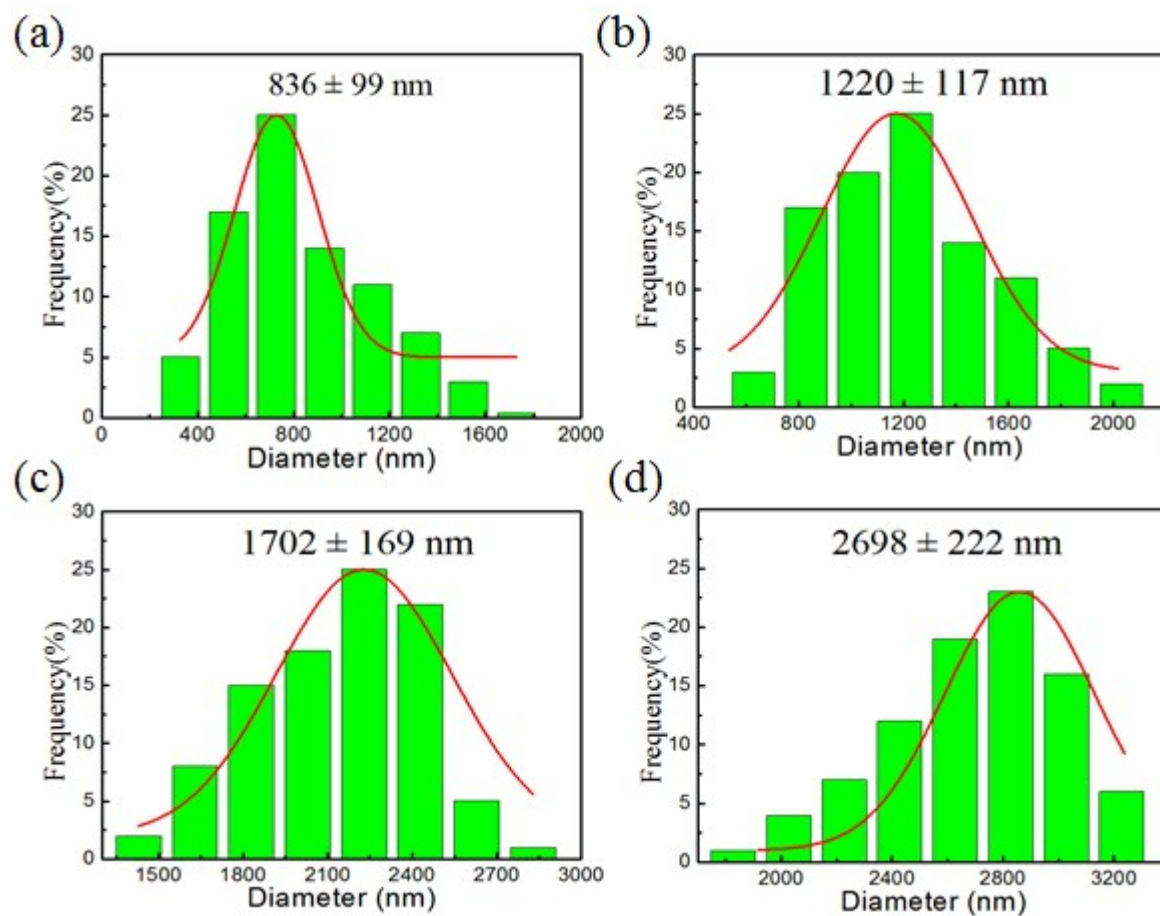

**Fig. S2** Histogram of diameter distribution of PVDF fibers electrospun at different levels of RH.

(a) 2%, (b) 22%, (c) 42%, and (d) 62%.

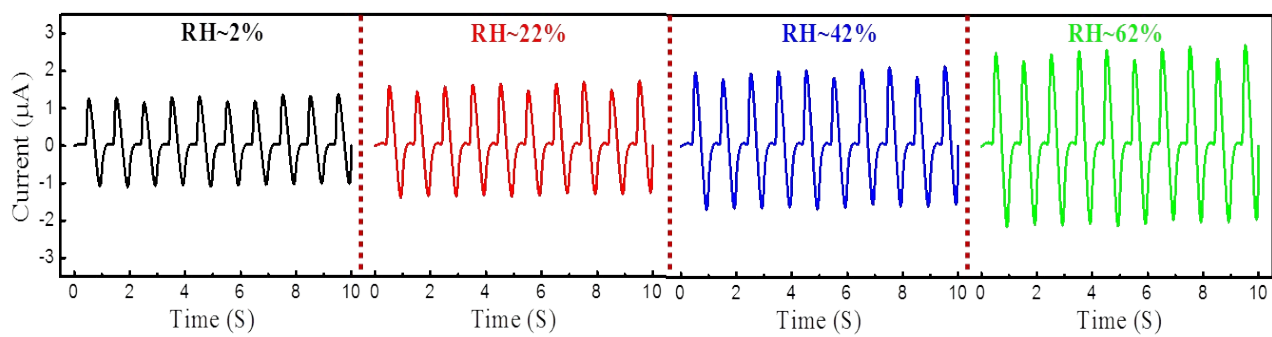

**Fig. S3** Current output generated by the PENG based on PVDF fiber webs at different levels of RH.

***Determination the content of  $\beta$  phase ( $F[\beta]$ ) and crystallinity ( $\Delta X_c$ )***

The  $F(\beta)$  can be calculated using the Eq.(S1):

$$F(\beta)=X_{\beta}/(X_{\alpha}+X_{\beta})= A_{\beta}/[(K_{\beta}/K_{\alpha})A_{\alpha}+A_{\beta}]=A_{\beta}/[1.26A_{\alpha}+A_{\beta}] \quad (S1)$$

Where  $X_{\alpha}$  and  $X_{\beta}$  are the crystalline rate of  $\alpha$  and  $\beta$  phases, respectively.  $A_{\alpha}$  and  $A_{\beta}$  represent the height of absorption bands at 762 and 840  $\text{cm}^{-1}$ , respectively.  $K_{\alpha}=6.1 \times 10^4 \text{ cm}^2/\text{mol}$  and  $K_{\beta}=7.7 \times 10^4 \text{ cm}^2/\text{mol}$  are the absorption coefficients at the respective wavenumber <sup>1-5</sup>.

The  $\Delta X_c$  can be calculated according to the Eq. (S2):

$$\Delta X_c = \Delta X_m / (X\Delta X_{\alpha} + Y\Delta X_{\beta}) \quad (S2)$$

Where,  $\Delta X_m$  is the melting enthalpy of the sample;  $\Delta X_{\alpha}=93.07 \text{ J/g}$  and  $\Delta X_{\beta}=103.4 \text{ J/g}$  are the melting enthalpy of a 100% crystalline sample in  $\alpha$  and  $\beta$  phases, respectively, while X and Y are the amounts of  $\alpha$  and  $\beta$  phases in the sample, respectively <sup>1, 2, 5</sup>.

## References

1. M. Baqeri, M. M. Abolhasani, M. R. Mozdianfard, Q. Guo, A. Oroumei and M. Naebe, J. Appl. Polym. Sci., 2015, 132.
2. A. Gheibi, R. Bagherzadeh, A. A. Merati and M. Latifi, J. Polym. Res., 2014, 21, 571.
3. Y.-L. Liu, Y. Li, J.-T. Xu and Z.-Q. Fan, ACS Appl. Mater. Interfaces., 2010, 2, 1759-1768.
4. M. Benz and W. B. Euler, J. Appl. Polym. Sci, 2003, 89, 1093-1100.
5. S. Lanceros-Mendez, J. Mano, A. Costa and V. Schmidt, J. Macromol. Sci. Part B., 2001, 40, 517-527.
